# Supplementary material for: Polymer end-group mediated synthesis of well-defined catalytically active platinum nanoparticles
Source: Royal Society of Chemistry journal article supplement (doi:10.1039/c1jm13137k), 2011-01-01
Supplement: c1jm13137k.pdf [file c1jm13137k.pdf]

## Supplementary Information

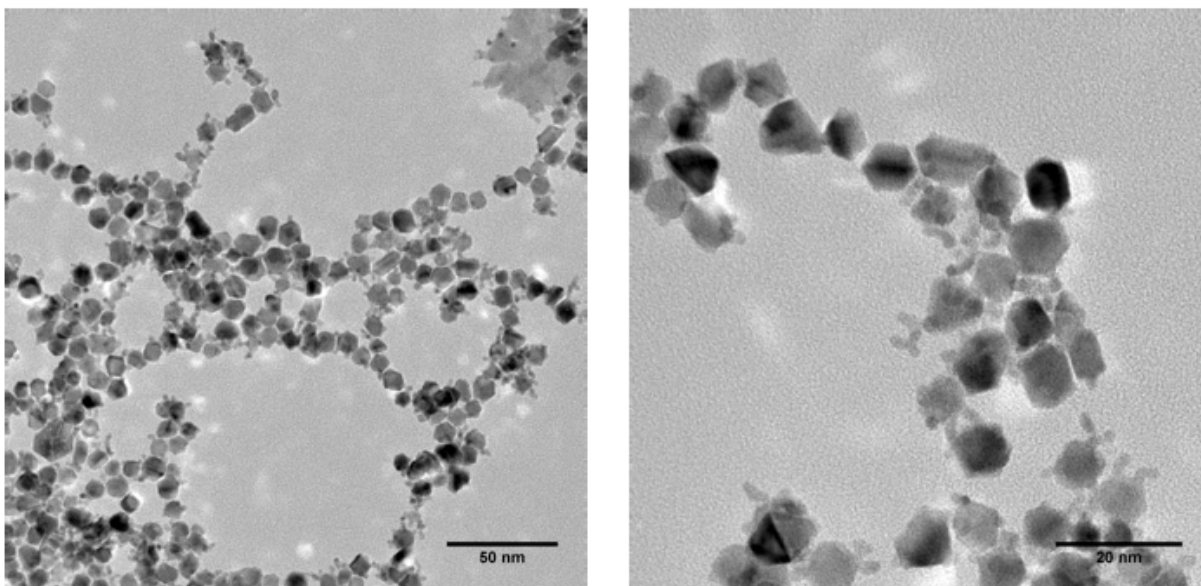

**Figure S1.** Low and high magnification TEM images of platinum particles synthesized using n-butanol.

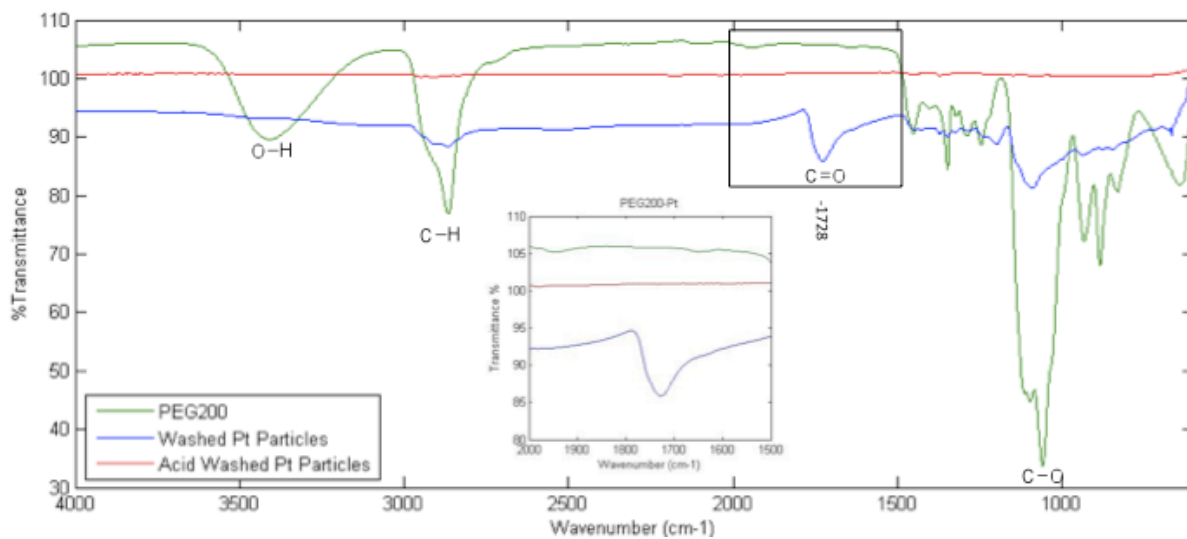

**Figure S2.** Normalized FTIR spectra of PEG200, washed PEG200 platinum and acid washed PEG200 platinum nanoparticles.

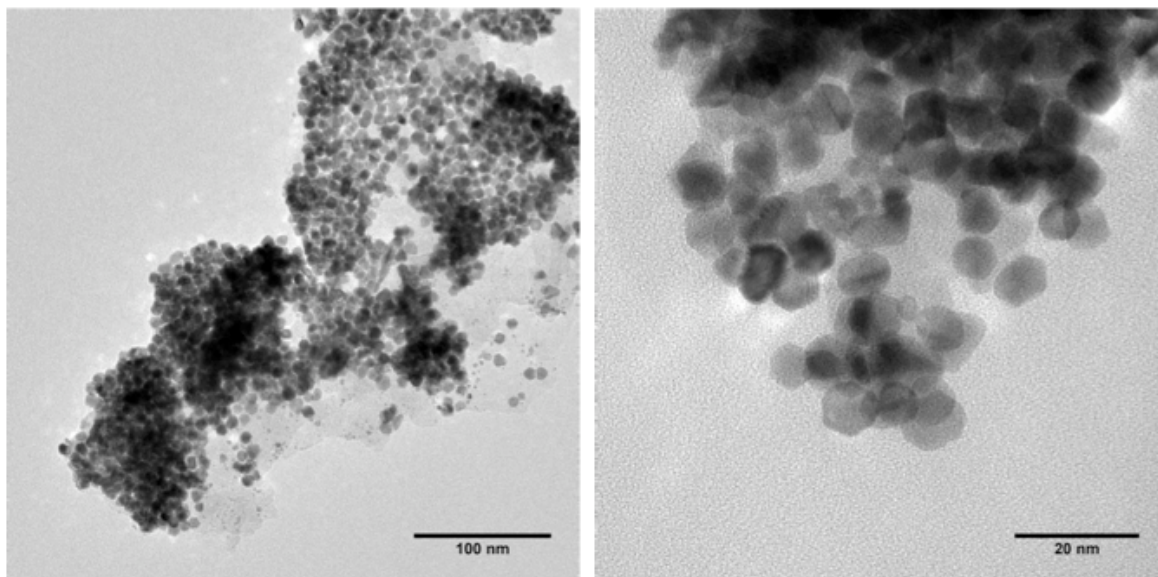

**Figure S3.** Low and high magnification TEM images of the PEG200 synthesized platinum particles after washing with 0.1M H<sub>2</sub>SO<sub>4</sub>.
